# Supplementary material for: Problems With Using Patient Retention in the Evaluation of Mental Health Providers: Differences in Type of Dropout
Source: Atypon-hosted journal article supplement (doi:10.1176/appi.ps.201400059), 2015-04-15
Supplement: appi.ps.201400059.ds001.pdf [file appi.ps.201400059.ds001.pdf]

## Online Appendix

Effect of between provider differences in caseload level covariates.

|                          | General Dropout                  |                     | Good Dropout                     |                     | Bad Dropout                      |                     |
|--------------------------|----------------------------------|---------------------|----------------------------------|---------------------|----------------------------------|---------------------|
|                          | Posterior Mean<br>(Fixed Effect) | 95% HPD<br>Interval | Posterior Mean<br>(Fixed Effect) | 95% HPD<br>Interval | Posterior Mean<br>(Fixed Effect) | 95% HPD<br>Interval |
| <b>Primary Diagnosis</b> |                                  |                     |                                  |                     |                                  |                     |
| Depression               | -0.14                            | -1.31 – 1.15        | -0.30                            | -1.61 – 1.36        | 2.66                             | -0.44 – 6.04        |
| Anxiety                  | -0.12                            | -1.25 – 1.32        | -0.07                            | -1.70 – 1.62        | 3.12                             | -0.18 – 6.60        |
| Bipolar/Psychosis        | 2.99                             | 1.45 – 4.70         | 1.60                             | -0.43 – 3.45        | 2.84                             | -1.10 – 6.38        |
| Other                    | 2.32                             | 0.79 – 3.68         | 1.47                             | -0.13 – 3.14        | 3.89                             | 0.97 – 7.63         |
| <b>Gender</b>            |                                  |                     |                                  |                     |                                  |                     |
| Female                   | -0.74                            | -1.53 – 0.11        | 0.00                             | -0.95 – 1.01        | -0.32                            | -1.52 – 0.93        |
| <b>Age</b>               |                                  |                     |                                  |                     |                                  |                     |
| ≥50                      | 1.88                             | 1.24 – 2.52         | 1.32                             | 0.54 – 2.11         | 0.44                             | -0.50 – 1.43        |

Note. The mean of the posterior distribution (estimated between-provider effect) and the 95% highest posterior density interval (estimated range in which most of the posterior distribution lies) for each caseload level covariate. Computed on a log odds scale, the posterior means above provide a test of the effect of different covariates on provider differences in general, good, and bad dropout. A 95% HPD confidence band is statistically significant when it excludes 0.
